# Supplementary material for: Identifying biologically interpretable transcription factor knockout targets by jointly analyzing the transcription factor knockout microarray and the ChIP-chip data
Source: Springer Nature journal article supplement (doi:10.1186/1752-0509-6-102), 2012-01-01

# TF Binding Network

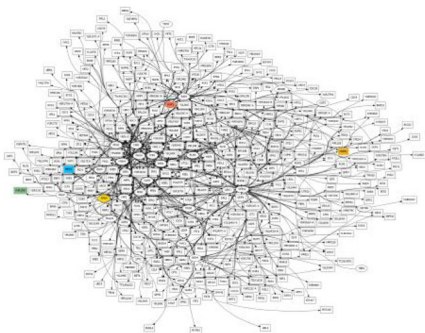

Given a pair (TF A, Gene X)  
Gene X : a TF knockout target of TF A in the original dataset

Using our mBFS algorithm to determine whether there exists a path in the TF binding network from TF A to Gene X

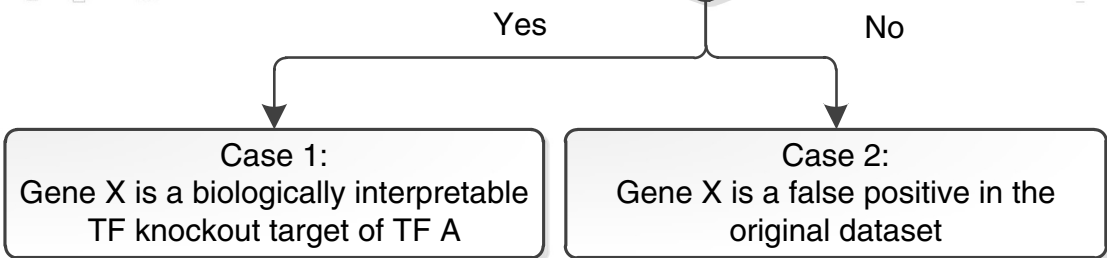

Case 1a: A shortest path of length one is found

e.g. (Hsf1, HSP82)

Case 1b: A shortest path of length larger than one is found

e.g. (Hsf1, RPT4)

e.g. (Hsf1, YGR259C)

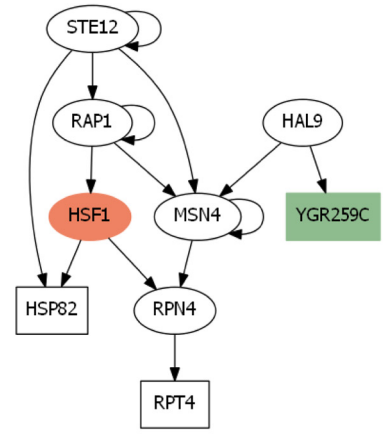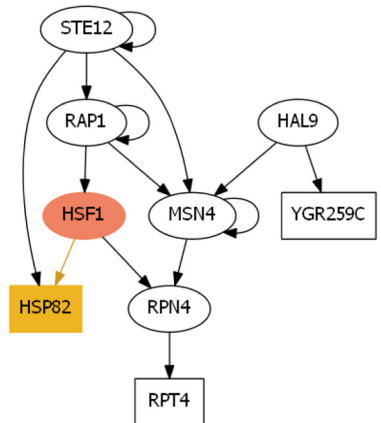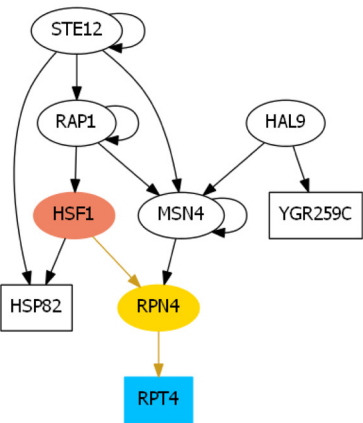

Supplement: 12918_2012_936_MOESM11_ESM.pdf [file 12918_2012_936_MOESM11_ESM.pdf]
