# Supplementary material for: Identifying biologically interpretable transcription factor knockout targets by jointly analyzing the transcription factor knockout microarray and the ChIP-chip data
Source: Springer Nature journal article supplement (doi:10.1186/1752-0509-6-102), 2012-01-01

The knockout targets of the TFs under study (inferred from the TFKM data)

The genes bound by the TFs under study (inferred from the ChIP-chip data)

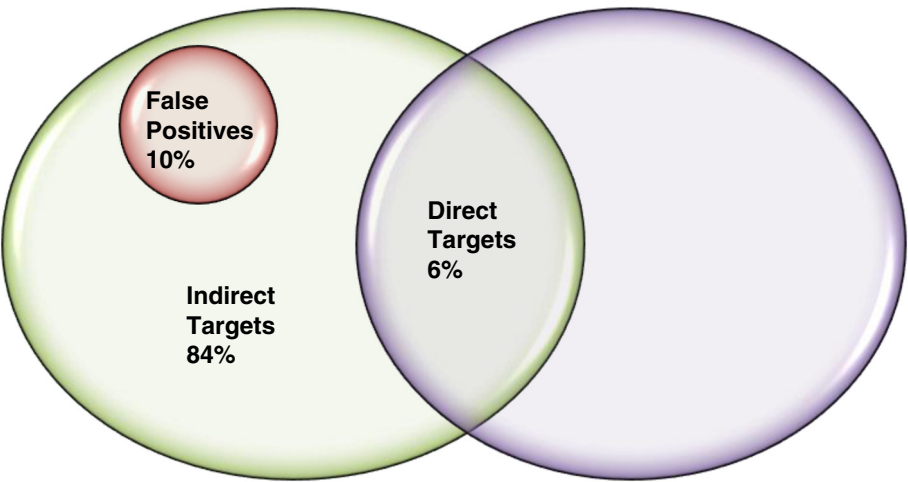

Supplement: 12918_2012_936_MOESM13_ESM.pdf [file 12918_2012_936_MOESM13_ESM.pdf]
